# Supplementary material for: Integrated Gas Chromatograph-Mass Spectrometry (GC/MS) and MS/MS-Based Molecular Networking Reveals the Analgesic and Anti-Inflammatory Phenotypes of the Sea Slater Ligia exotica
Source: PubMed Central journal article supplement (PMC6669569; doi:10.3390/md17070395), 2019-07-04
Supplement: marinedrugs-17-00395-s001.pdf [file marinedrugs-17-00395-s001.pdf]

Supplementary data

# **Integrated Gas Chromatograph-Mass Spectrometry (GC/MS) and MS/MS-Based Molecular Networking Reveals the Analgesic and Anti-Inflammatory Phenotypes of the Sea Slater *Ligia exotica***

**Yang Yue**<sup>1,2,3</sup>, **Quanbin Zhang**<sup>1,2,3,\*</sup> and **Jing Wang**<sup>1,2,3</sup>

<sup>1</sup> Key Laboratory of Experimental Marine Biology, Institute of Oceanology, Chinese Academy of Sciences, 7 Nanhai Road, Qingdao 266071, China; yueyang@qdio.ac.cn(Y.Y.), qbzhang@qdio.ac.cn(Q.Z.); jingwang@qdio.ac.cn(J.W.)

<sup>2</sup> Laboratory for Marine Biology and Biotechnology, Qingdao National Laboratory for Marine Science and Technology, Qingdao, 266237, China; yueyang@qdio.ac.cn(Y.Y.), qbzhang@qdio.ac.cn(Q.Z.); jingwang@qdio.ac.cn(J.W.)

<sup>3</sup> Center for Ocean Mega-Science, Chinese Academy of Sciences, 7 Nanhai Road, Qingdao, 266071, China; yueyang@qdio.ac.cn(Y.Y.), qbzhang@qdio.ac.cn(Q.Z.); jingwang@qdio.ac.cn(J.W.)

\* Correspondence: qbzhang@qdio.ac.cn(Q.Z.); Tel.: +86-0532-82898703

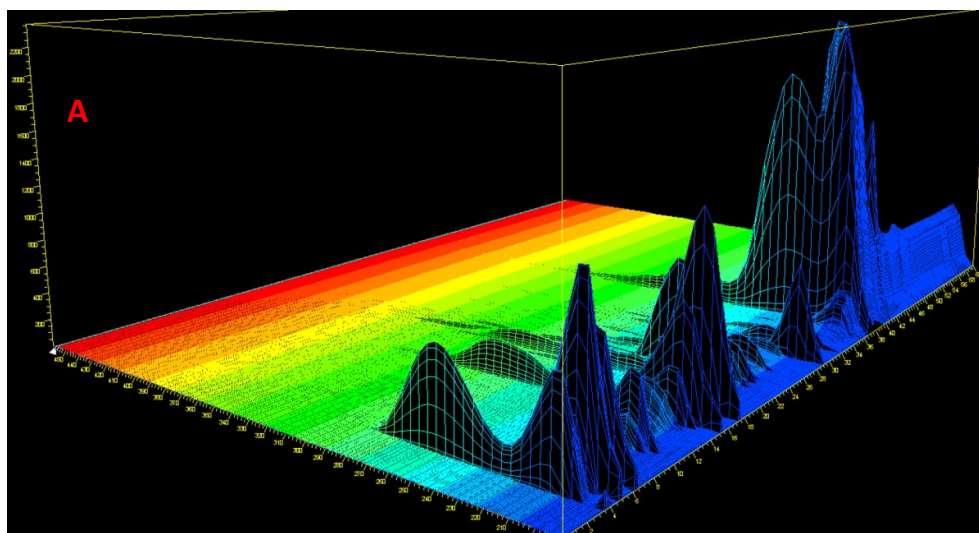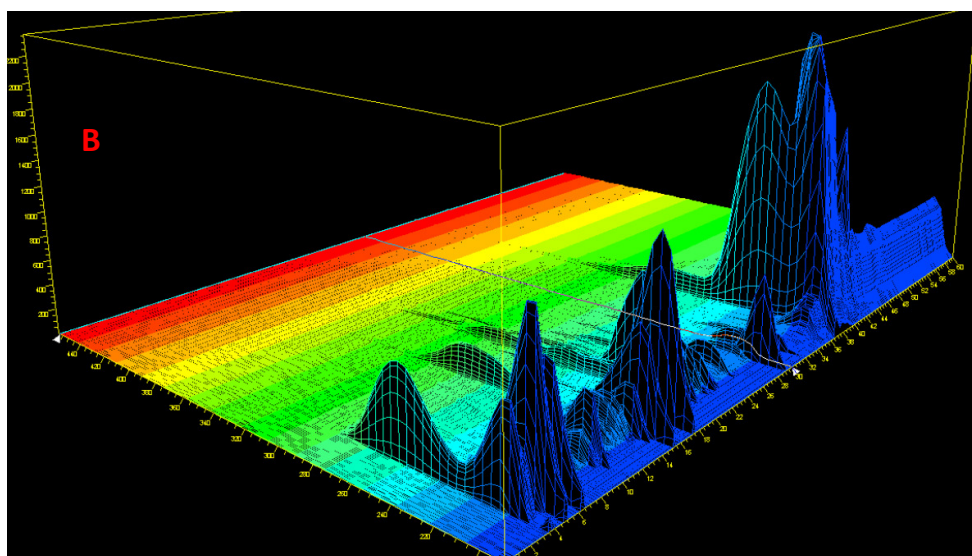

Figure S1. UV absorbance of peaks occurred in the HPLC chromatograms of PE (A) and EE (B) from 200 nm to 450 nm.

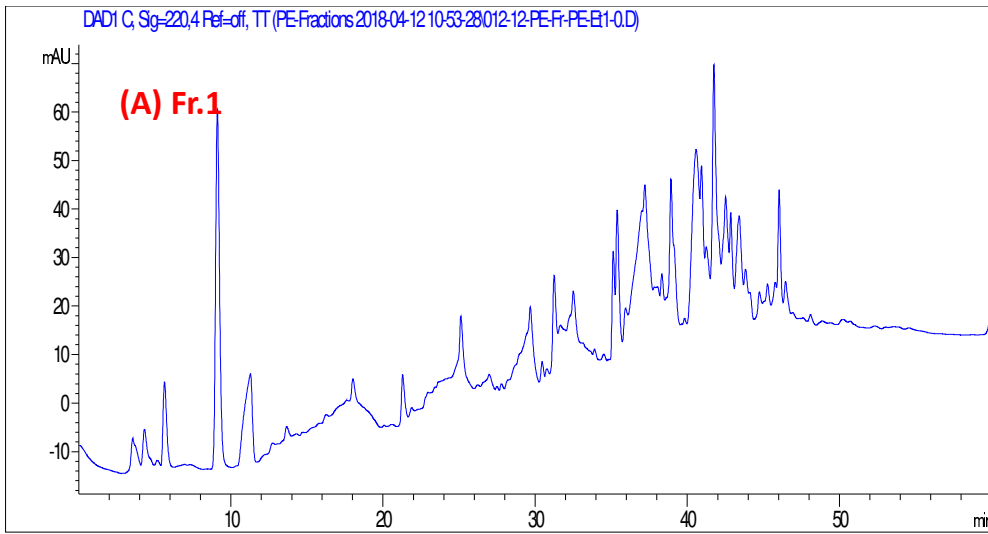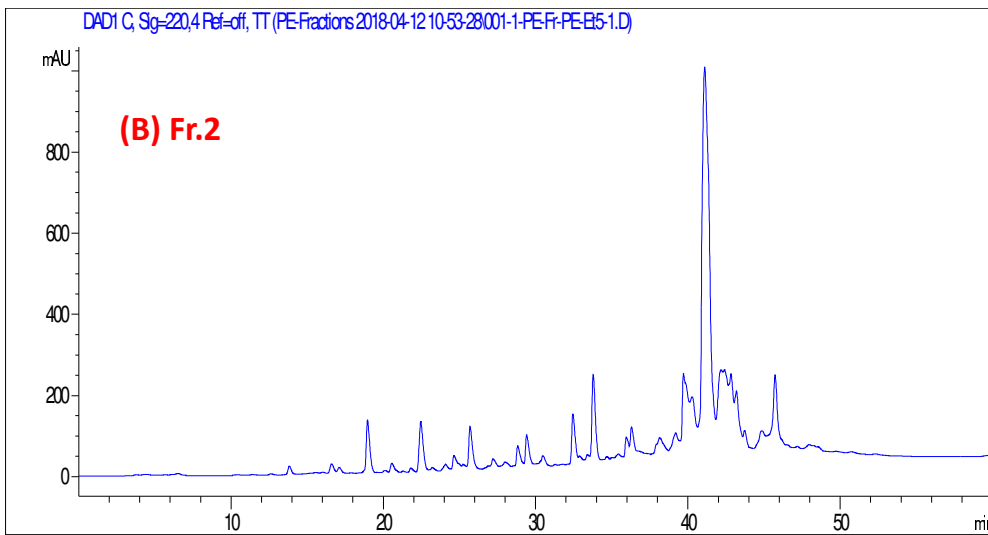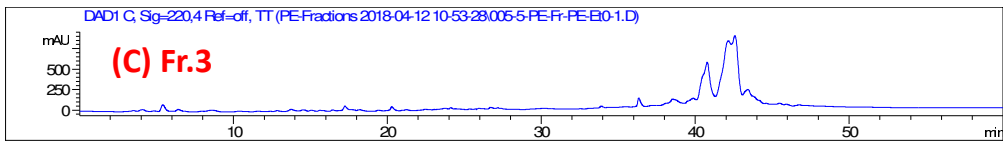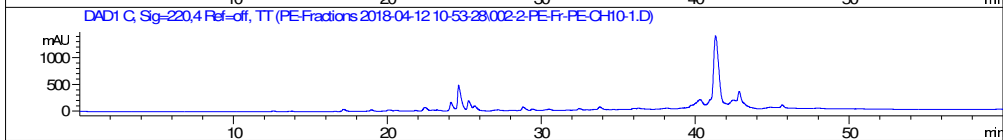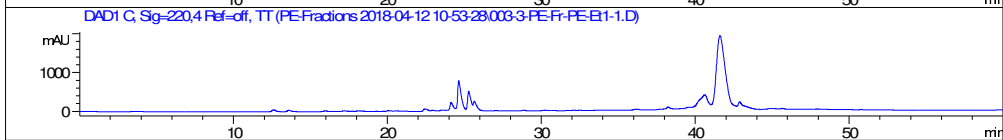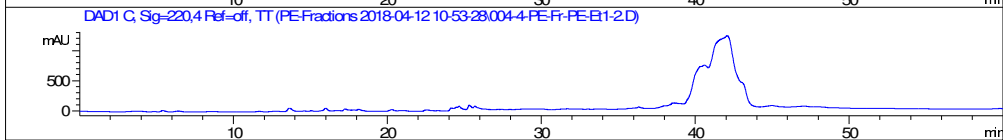

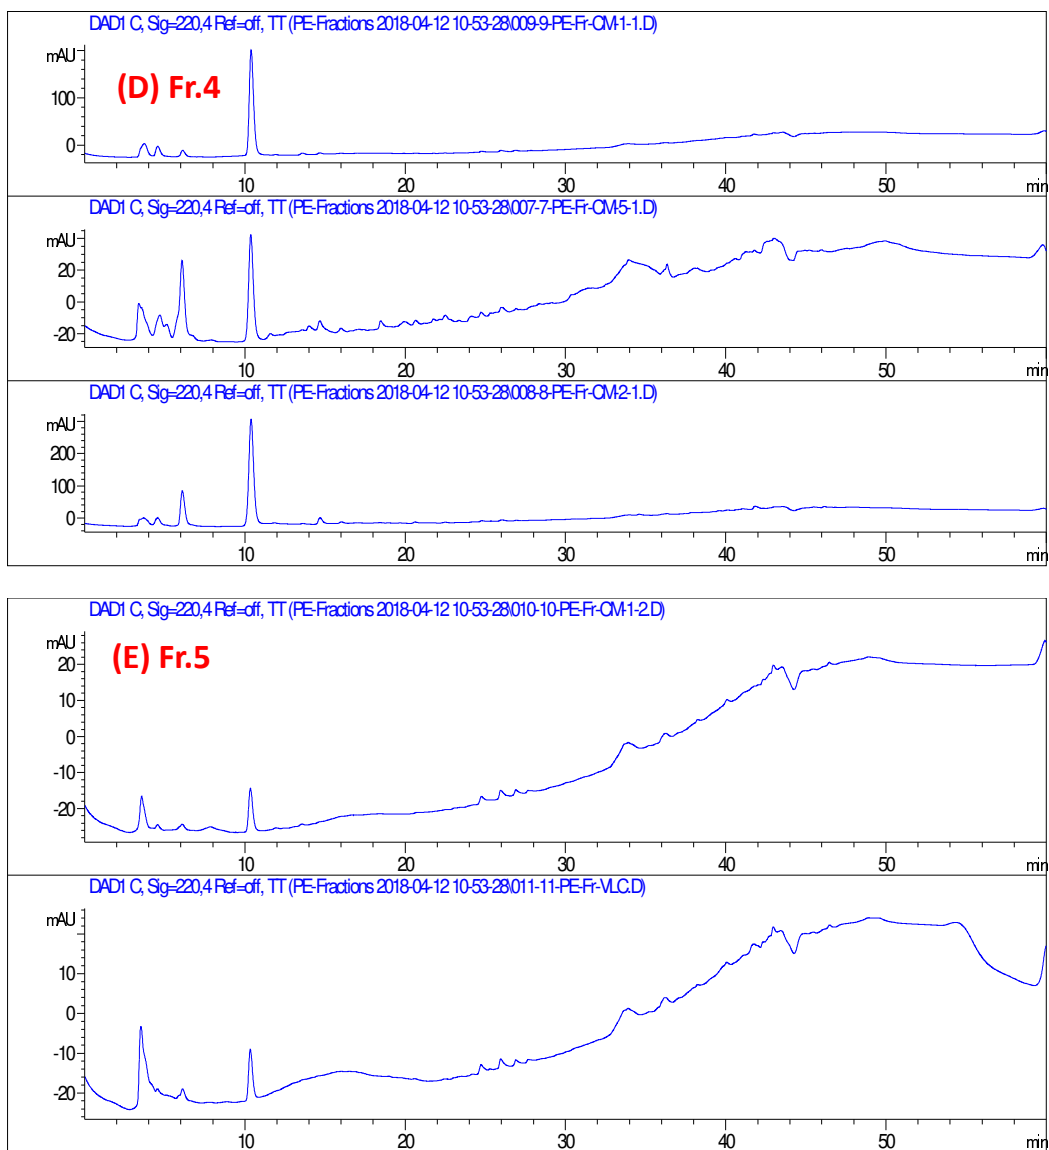

Figure S2. HPLC chromatograms of the combined PE fractions Fr.1-5 (A-E) at 220 nm.

| Names            | total | Compounds                                            |
|------------------|-------|------------------------------------------------------|
| 50E 95E EE ME PE | 2     | 19 43                                                |
| 95E EE ME PE     | 1     | 36                                                   |
| 50E 95E ME PE    | 3     | 18 2 1                                               |
| 95E EE PE        | 1     | 42                                                   |
| 95E ME PE        | 8     | 10 11 29 40 14 3 8 4                                 |
| EE PE            | 18    | 33 7 26 27 20 31 12 15 45 30 25 28 24 22 46 23 13 34 |
| ME PE            | 1     | 39                                                   |
| 95E PE           | 1     | 6                                                    |
| 95E ME           | 3     | 63 64 62                                             |
| PE               | 11    | 32 21 16 44 35 41 17 9 38 37 5                       |
| EE               | 15    | 55 57 61 48 50 58 52 60 56 54 59 49 53 51 47         |
| 95E              | 3     | 65 66 67                                             |
| 50E              | 2     | 68 69                                                |

Figure S3. Outputs of venn diagram using the compounds 1-69 identified from PE, EE, ME, 95E, 50E by MS/MS-based spectral matching. The compound names have been shown in Table 5, and visualization of the results is presented in Figure 7A.

**Table S1.** The relative content of the major compounds identified from PE and EE by comparing their respective peak area to the total areas.

| Compound_Names<br>(MD <sup>a</sup> ≥ 95%) | Relative Peak Area (%) |         |         |         |       |
|-------------------------------------------|------------------------|---------|---------|---------|-------|
|                                           | PE-Fr.1                | PE-Fr.2 | PE-Fr.3 | PE-Fr.4 | EE    |
| Z-9-hexadecenoic acid                     | - <sup>d</sup>         | 32.69   | 39.40   | -       | 36.06 |
| Z-11-hexadecenoic acid                    | 29.86                  | -       | -       | -       | -     |
| n-hexadecanoic acid                       | -                      | 1.85    | 5.34    | -       | 3.20  |
| Ethyl 9-hexadecenoate                     | 5.3                    | 0.38    | 1.84    | -       | -     |
| (Z,Z)-9,12-octadecadienoic acid           | 3.98                   | 7.81    | -       | -       | 3.44  |
| E-13-octadecenoic acid                    | 12.83                  | -       | -       | -       | -     |
| 6-octadecenoic acid                       | 9.00                   | 23.62   | 32.88   | -       | 1.95  |
| Ethyl oleate                              | 4.58                   | 2.58    | -       | -       | -     |
| Cholesterol                               | 6.52                   | 17.12   | -       | -       | -     |
| Unsaturated fatty acids                   | 55.67                  | 65.97   | 77.62   | -       | 44.65 |
| SUM <sup>b</sup>                          | 68.09                  | 86.05   | 79.42   | 0       | 44.65 |
| SUM <sup>c</sup>                          | 79.99                  | 89.60   | 80.13   | 0       | 56.31 |
| Unidentified peaks                        | 20.01                  | 11.40   | 19.87   | 100     | 46.69 |

Notes: a, MD means Matching Degree; b, SUM represents the sum of relative peak area of the compounds listed in this table; c, SUM means the total sum of relative peak area of all compounds identified by GC-MS with MD ≥ 95%; d, not detected.

Table S2. Compounds putatively identified from *Logia* extracts by MS/MS spectral comparison with cosine score value of 0.70

| Compounds | RT_Query(s) | Precursor_MZ(Da) | Compound_Name                                                                            | SharedPeaks | MQScore  |
|-----------|-------------|------------------|------------------------------------------------------------------------------------------|-------------|----------|
| 1         | 70.802      | 166.087          | Massbank:PB000408 Phenylalanine   2-amino-3-phenylpropanoic acid                         | 6           | 0.956563 |
|           | 70.802      | 166.083          | Spectral Match to DL-Phenylalanine from NIST14                                           | 17          | 0.926237 |
| 2         | 82.189      | 205.098          | Massbank:PB006083 Tryptophan   (2S)-2-amino-3-(1H-indol-3-yl)propanoic acid              | 25          | 0.954918 |
|           | 82.189      | 205.097          | Spectral Match to L-Tryptophan from NIST14                                               | 30          | 0.952962 |
| 3         | 83.523      | 188.07           | Spectral Match to Abrine from NIST14(3-(2-Indolyl)-2-methylaminopropanoic acid)          | 10          | 0.920207 |
| 4         | 83.523      | 188.071          | Spectral Match to DL-Indole-3-lactic acid from NIST14                                    | 13          | 0.921548 |
| 5         | 96.254      | 265.154          | Spectral Match to Phe-Val from NIST14                                                    | 19          | 0.787928 |
| 6         | 127.29      | 231.114          | 1,2,3,4-tetrahydroharmine-3-carboxylic acid                                              | 10          | 0.85109  |
| 7         | 147.378     | 136.076          | Spectral Match to DL-Octopamine from NIST14                                              | 6           | 0.728619 |
| 8         | 151.331     | 279.17           | Spectral Match to Phe-Leu from NIST14                                                    | 14          | 0.923904 |
| 9         | 171.655     | 279.169          | Spectral Match to Leu-Phe from NIST14                                                    | 7           | 0.718983 |
| 10        | 214.147     | 279.169          | Spectral Match to Phe-Ile from NIST14                                                    | 8           | 0.909698 |
|           | 260.648     | 208.097          | NCGC00042134-05_C11H13NO3_N-Acetylphenylalanine                                          | 12          | 0.836929 |
| 11        | 260.648     | 208.097          | Spectral Match to L-Phenylalanine, N-acetyl- from NIST14                                 | 10          | 0.91052  |
|           | 287.152     | 245.128          | NCGC00380633-02_C14H16N2O2_Pyrrolo[1,2-a]pyrazine-1,4-dione, hexahydro-3-(phenylmethyl)- | 18          | 0.718626 |
| 12        | 287.152     | 245.128          | NCGC00381359-01_C14H18N2O3_Phenylalanine, prolyl-                                        | 19          | 0.747031 |
| 13        | 292.27      | 313.155          | Spectral Match to Phe-Phe from NIST14                                                    | 9           | 0.95749  |
| 14        | 393.38      | 164.107          | N-acetyl-2-phenylethylamine                                                              | 7           | 0.8942   |

|    |         |         |                                                                                                                                                                                               |     |          |
|----|---------|---------|-----------------------------------------------------------------------------------------------------------------------------------------------------------------------------------------------|-----|----------|
| 16 | 883.698 | 333.206 | NCGC00385270-01_C20H28O4_5-[2-(3-Furyl)ethyl]-8-hydroxy-5,6,8a-trimethyl-3,4,4a,5,6,7,8,8a-octahydro-1-naphthalenecarboxylic acid                                                             | 168 | 0.727051 |
| 17 | 883.698 | 333.206 | NCGC00385272-01_C20H28O4_5-[2-(3-Furyl)ethyl]-8a-(hydroxymethyl)-5,6-dimethyl-3,4,4a,5,6,7,8,8a-octahydro-1-naphthalenecarboxylic acid                                                        | 169 | 0.730714 |
| 18 | 1018.02 | 415.211 | NCGC00347704-02_C24H32O7_2H-Oxireno[1,10a]phenanthro[3,2-b]furan-10(11bH)-one, 5,7-bis(acetyloxy)-3,3a,4,5,6,7,7a,7b,8,8a-decahydro-4,4,7a,11-tetramethyl-, (1aS,3aR,5S,7S,7aR,7bS,8aR,11bR)- | 49  | 0.887886 |
| 19 | 1018.02 | 415.211 | NCGC00385811-01!6-[3-[(3,4-dimethoxyphenyl)methyl]-4-methoxy-2-(methoxymethyl)butyl]-4-methoxy-1,3-benzodioxole                                                                               | 25  | 0.896878 |
| 20 | 1101.95 | 301.215 | Spectral Match to 14(15)-EpETE from NIST14                                                                                                                                                    | 147 | 0.808564 |
| 21 | 1135.87 | 293.211 | Spectral Match to 9(S)-HpOTrE from NIST14                                                                                                                                                     | 52  | 0.712923 |
| 22 | 1148.93 | 301.216 | Spectral Match to 17(18)-EpETE from NIST14                                                                                                                                                    | 127 | 0.809739 |
| 23 | 1148.93 | 301.216 | Spectral Match to (+/-)-8-Hydroxy-5Z,9E,11Z,14Z,17Z-eicosapentaenoic acid from NIST14                                                                                                         | 134 | 0.814645 |
| 24 | 1170.15 | 303.231 | Spectral Match to 11S-Hydroxy-5Z,8Z,12E,14Z-eicosatetraenoic acid from NIST14                                                                                                                 | 150 | 0.852725 |
| 25 | 1170.15 | 303.231 | Spectral Match to 15(S)-Hydroxy-(5Z,8Z,11Z,13E)-eicosatetraenoic acid from NIST14                                                                                                             | 150 | 0.865231 |
| 26 | 1172.17 | 279.231 | Spectral Match to Pinolenic acid from NIST14                                                                                                                                                  | 96  | 0.773502 |
| 27 | 1176.45 | 295.226 | Spectral Match to 13-Keto-9Z,11E-octadecadienoic acid from NIST14                                                                                                                             | 86  | 0.820771 |
| 28 | 1178.25 | 277.216 | Spectral Match to 13S-Hydroxy-9Z,11E,15Z-octadecatrienoic acid from NIST14                                                                                                                    | 68  | 0.76488  |
| 29 | 1188.09 | 482.36  | Spectral Match to 1-Hexadecyl-sn-glycero-3-phosphocholine from NIST14                                                                                                                         | 7   | 0.887771 |

|    |         |         |                                                                                                                                            |     |          |
|----|---------|---------|--------------------------------------------------------------------------------------------------------------------------------------------|-----|----------|
| 30 | 1191.89 | 317.211 | 9-hydroxy-1,4a-dimethyl-7-propan-2-yl-2,3,4,9,10,10a-hexahydrophenanthrene-1-carboxylic acid                                               | 114 | 0.732695 |
| 31 | 1191.89 | 317.211 | NCGC00380535-01_C20H28O3_12-Oxopimara-9(11),15-dien-18-oic acid                                                                            | 132 | 0.727094 |
| 32 | 1200.88 | 277.216 | Spectral Match to 9,12-Octadecadiynoic Acid from NIST14                                                                                    | 63  | 0.707527 |
| 33 | 1211.54 | 317.211 | 7-ethenyl-1,4a,7-trimethyl-6-oxo-2,3,4,8,8a,9,10,10a-octahydrophenanthrene-1-carboxylic acid                                               | 51  | 0.713914 |
| 34 | 1216.52 | 295.227 | Spectral Match to 9-Oxo-10E,12Z-octadecadienoic acid from NIST14                                                                           | 97  | 0.798115 |
| 35 | 1222.44 | 303.232 | Spectral Match to 8S-Hydroxy-5Z,9E,11Z,14Z-eicosatetraenoic acid from NIST14                                                               | 90  | 0.75798  |
| 36 | 1227.3  | 279.159 | Spectral Match to Dibutyl phthalate from NIST14                                                                                            | 9   | 0.923685 |
| 37 | 1290.23 | 323.258 | Eicosanoids_15-oxoEDE_C20H34O3                                                                                                             | 45  | 0.722368 |
|    | 1290.23 | 323.258 | Spectral Match to 15-OxoEDE from NIST14                                                                                                    | 54  | 0.727381 |
| 38 | 1293.26 | 323.258 | NCGC00169469-03_C20H34O3_1-Naphthalenecarboxylic acid, decahydro-5-(5-hydroxy-3-methylpentyl)-1,4a-dimethyl-6-methylene-, (1R,4aS,5R,8aS)- | 107 | 0.736152 |
| 39 | 1316.52 | 552.401 | Spectral Match to 1-Arachidoyl-2-hydroxy-sn-glycero-3-phosphocholine from NIST14                                                           | 15  | 0.854794 |
| 40 | 1318.46 | 510.391 | Spectral Match to Lyso-PAF C-18 from NIST14                                                                                                | 9   | 0.893974 |
| 35 | 1349.1  | 303.23  | Spectral Match to 8-HETE from NIST14                                                                                                       | 56  | 0.746991 |
| 41 | 1370.87 | 307.263 | Spectral Match to Linolenic acid ethyl ester from NIST14                                                                                   | 64  | 0.809892 |
| 42 | 1389.49 | 402.301 | (Z)-N-hexadec-9-enoyl-L-phenylalanine                                                                                                      | 17  | 0.878151 |
| 43 | 1408.8  | 282.279 | Spectral Match to 9-Octadecenamide, (Z)- from NIST14                                                                                       | 37  | 0.795687 |
| 44 | 1463.23 | 404.316 | NCGC00380823-01!2-(14-methylpentadecanoylamino)-3-phenylpropanoic acid                                                                     | 26  | 0.90229  |
| 45 | 1866.48 | 369.351 | Spectral Match to Cholestan-3-one, (5.alpha.)- from NIST14                                                                                 | 27  | 0.75334  |



|    |         |         |                                                                                                                              |     |          |
|----|---------|---------|------------------------------------------------------------------------------------------------------------------------------|-----|----------|
| 46 | 1866.48 | 369.352 | Spectral Match to Cholesterol from NIST14                                                                                    | 24  | 0.763294 |
| 47 | 89.587  | 261.123 | NCGC00384639-01_C14H16N2O3_Pyrrolo[1,2-a]pyrazine-1,4-dione,<br>hexahydro-3-[(4-hydroxyphenyl)methyl]-                       | 53  | 0.734621 |
| 48 | 115.327 | 180.102 | N-acetyltyramine                                                                                                             | 9   | 0.811762 |
|    | 334.623 | 197.117 | Loliolide                                                                                                                    | 38  | 0.765238 |
| 49 | 334.623 | 197.117 | NCGC00385365-01_C11H16O3_2(4H)-Benzofuranone,<br>5,6,7,7a-tetrahydro-6-hydroxy-4,4,7a-trimethyl-, (6S,7aR)-                  | 60  | 0.790237 |
| 50 | 354.718 | 146.06  | Spectral Match to 1H-Indole-4-carboxaldehyde from NIST14                                                                     | 6   | 0.84395  |
|    | 356.703 | 284.139 | cyclo(D-Trp-L-Pro)                                                                                                           | 16  | 0.950215 |
| 51 | 356.703 | 284.139 | NCGC00169940-02!3-(1H-indol-3-ylmethyl)-2,3,6,7,8,8a-hexahydropyrrolo[1,2-a]pyrazine-1<br>,4-dione                           | 17  | 0.933498 |
| 52 | 629.326 | 261.159 | cyclo(Phe-Leu)                                                                                                               | 34  | 0.737895 |
| 53 | 662.681 | 334.155 | NCGC00347762-02!3-benzyl-6-(1H-indol-3-ylmethyl)piperazine-2,5-dione                                                         | 13  | 0.888409 |
|    | 684.967 | 295.129 | Massbank:EA277006<br>Aspartame 3-amino-4-[(1-benzyl-2-keto-2-methoxy-ethyl)amino]-4-keto-butyric acid                        | 11  | 0.751393 |
| 54 | 684.967 | 295.129 | Massbank:EA277012<br>Aspartame 3-amino-4-[(1-benzyl-2-keto-2-methoxy-ethyl)amino]-4-keto-butyric acid                        | 14  | 0.750524 |
|    | 970.585 | 321.242 | 5-(1,2,4a,5-tetramethyl-7-oxo-3,4,8,8a-tetrahydro-2H-naphthalen-1-yl)-3-methylpentanoic<br>acid                              | 143 | 0.800957 |
| 55 | 970.585 | 321.242 | NCGC00180747-02!5-[(1S,2R,4aR)-1,2,4a,5-tetramethyl-7-oxo-3,4,8,8a-tetrahydro-2H-napht<br>halen-1-yl]-3-methylpentanoic acid | 152 | 0.804541 |
| 56 | 1187.73 | 327.231 | Spectral Match to (+/-)-11-Hydroxy-4Z,7Z,9E,13Z,16Z,19Z-docosahexaenoic acid from<br>NIST14                                  | 82  | 0.733423 |
| 57 | 1187.73 | 327.23  | Spectral Match to 19(20)-EpDPE from NIST14                                                                                   | 80  | 0.725253 |

|    |         |         |                                                                                                                                  |    |          |
|----|---------|---------|----------------------------------------------------------------------------------------------------------------------------------|----|----------|
| 58 | 1261.82 | 297.242 | Spectral Match to 9(10)-EpOME from NIST14                                                                                        | 36 | 0.702697 |
| 59 | 1322.28 | 304.26  | Spectral Match to Arachidonoyl amide from NIST14                                                                                 | 74 | 0.857892 |
| 60 | 1471.59 | 358.31  | phenylethylamide 357                                                                                                             | 46 | 0.81775  |
| 61 | 1551.27 | 628.187 | NCGC00385199-01!2-[3,4-bis[[[(2S,3R,4S,5S,6R)-3,4,5-trihydroxy-6-(hydroxymethyl)oxan-2-yl]oxy]phenyl]-5,7-dihydroxychromen-4-one | 28 | 0.741822 |
| 62 | 132.068 | 263.138 | Spectral Match to Phe-Pro from NIST14                                                                                            | 14 | 0.772827 |
| 63 | 386.204 | 352.165 | Spectral Match to Phe-Trp from NIST14                                                                                            | 9  | 0.880003 |
| 64 | 506.815 | 352.165 | Spectral Match to Trp-Phe from NIST14                                                                                            | 9  | 0.815122 |
| 65 | 75.058  | 229.16  | Spectral Match to Leu-Pro from NIST14                                                                                            | 6  | 0.792858 |
| 66 | 200.695 | 332.218 | Spectral Match to Thr-Val-Leu from NIST14                                                                                        | 7  | 0.732416 |
| 67 | 207.742 | 277.119 | Spectral Match to PyroGlu-Phe from NIST14                                                                                        | 16 | 0.73009  |
| 68 | 62.857  | 182.081 | Spectral Match to L-Tyrosine from NIST14                                                                                         | 11 | 0.947038 |
| 69 | 99.71   | 295.128 | Spectral Match to Glu Phe from METLIN                                                                                            | 9  | 0.777446 |
